# Supplementary material for: Capsazepine Treatment Alleviates Depression-Like Behaviors via TRPV1-Mediated Modulation of Neuroinflammation and Neurogenesis
Source: Research Square preprint supplement (doi:10.21203/rs.3.rs-6992017/v1), 2025-10-08

| Primary antibody | Institution | catalog numbers | Dilution rate |
| --- | --- | --- | --- |
| TRPV1 | affinity | DF10320 | 1:1000 |
| CAMK2 | HUABIO | ET1703-54 | 1:1000 |
| P-CAMK2(T286) | HUABIO | HA721794 | 1:1000 |
| JAK2 | absmart | T55287 | 1:1000 |
| P-JAK2(1007-1008) | HUABIO | ET1607-34 | 1:1000 |
| STAT3 | HUABIO | ET1607-38 | 1:1000 |
| P-STAT3(705) | HUABIO | ET1603-40 | 1:1000 |
| CD68 | HUABIO | ER1901-32 | 1:1000 |
| GFAP | HUABIO | EM140707 | 1:1000 |
| GAPDH | proteinech | HRP-60004 | 1:40000 |
| BRDU | proteinech | 66241-1-Ig | 1:200 |
| DCX | proteinech | 13925-1-AP | 1:200 |

**Supplement Table. 1 The details of primary antibody**

**
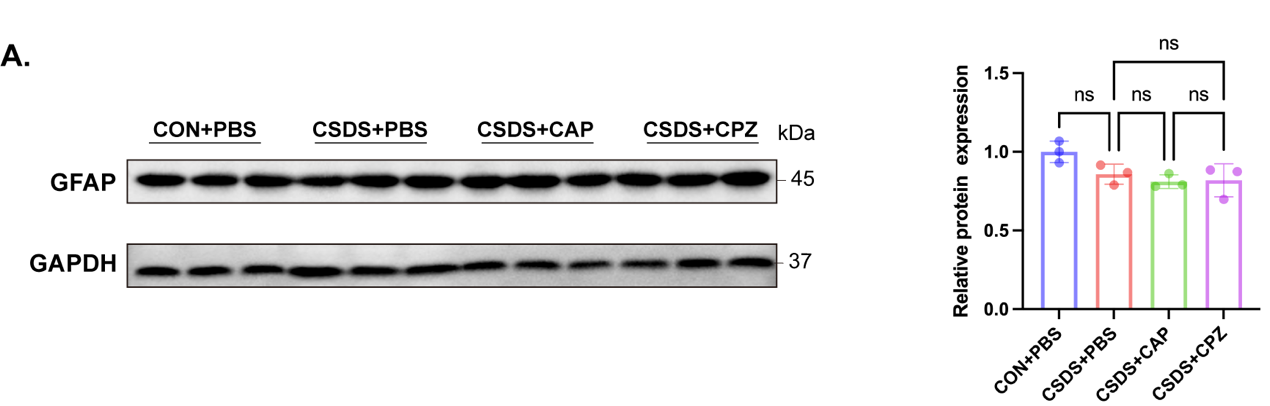
**

**Supplement Figure. 1:** Quantification of GFAP in the hippocampus, n=3. There were no significant difference among the four groups.

WB raw data


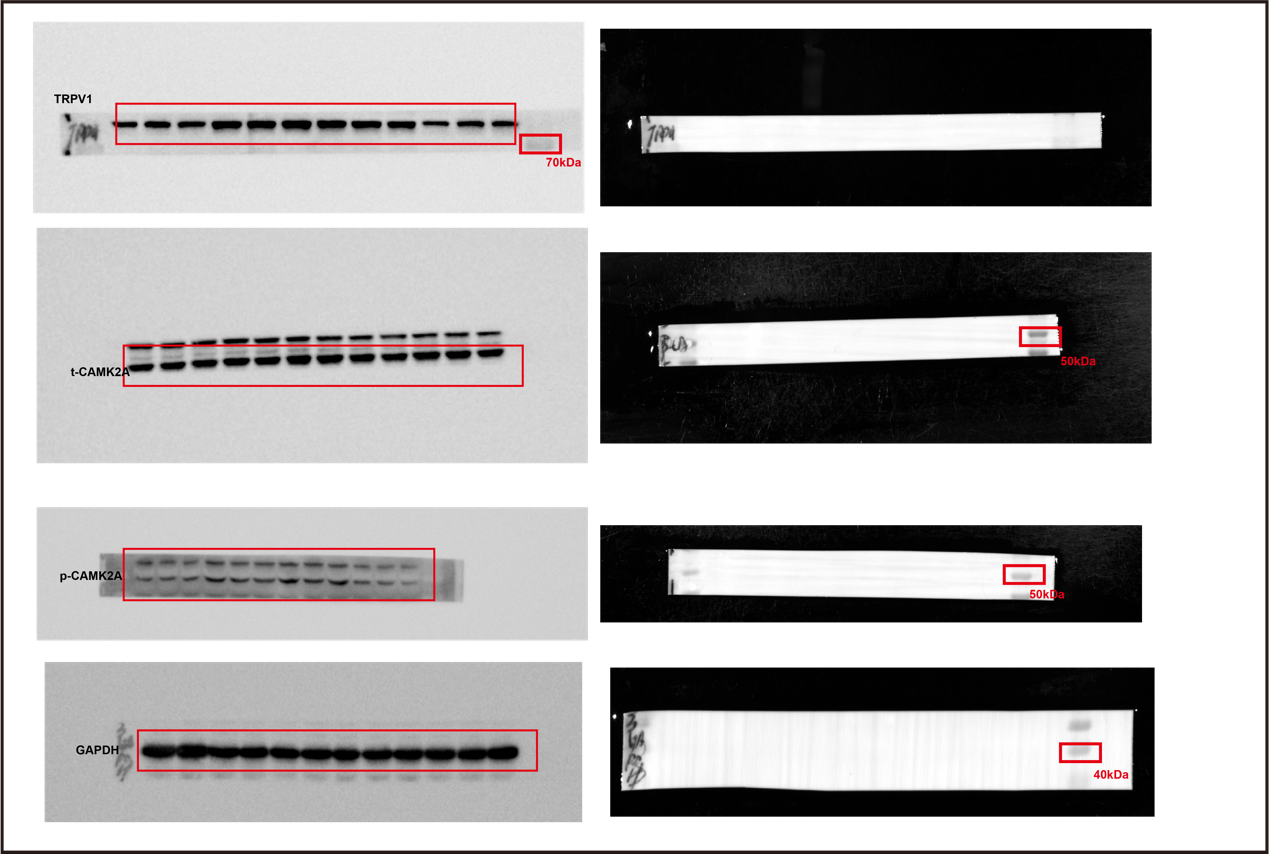


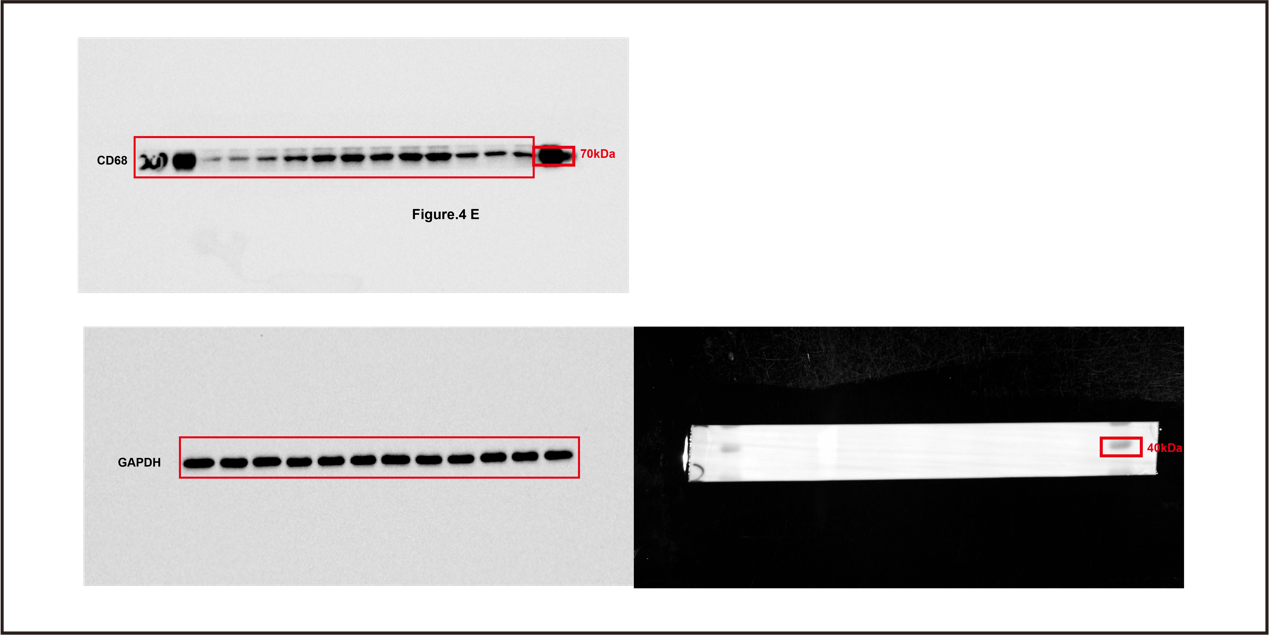


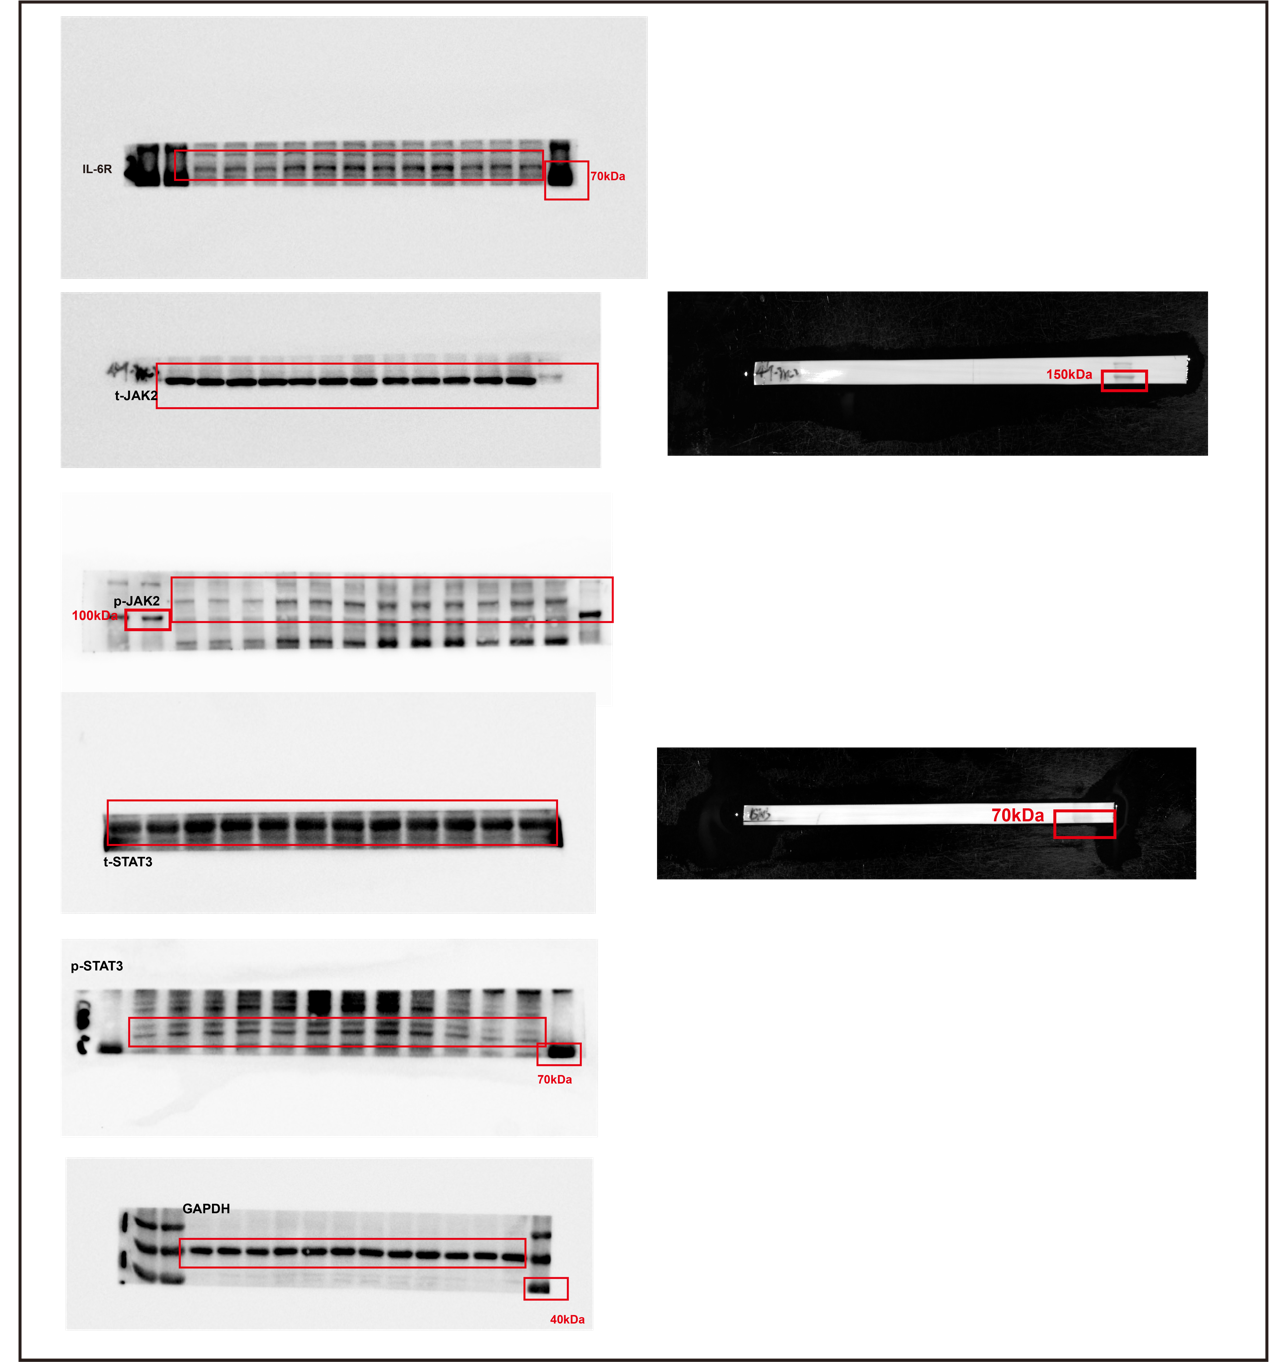


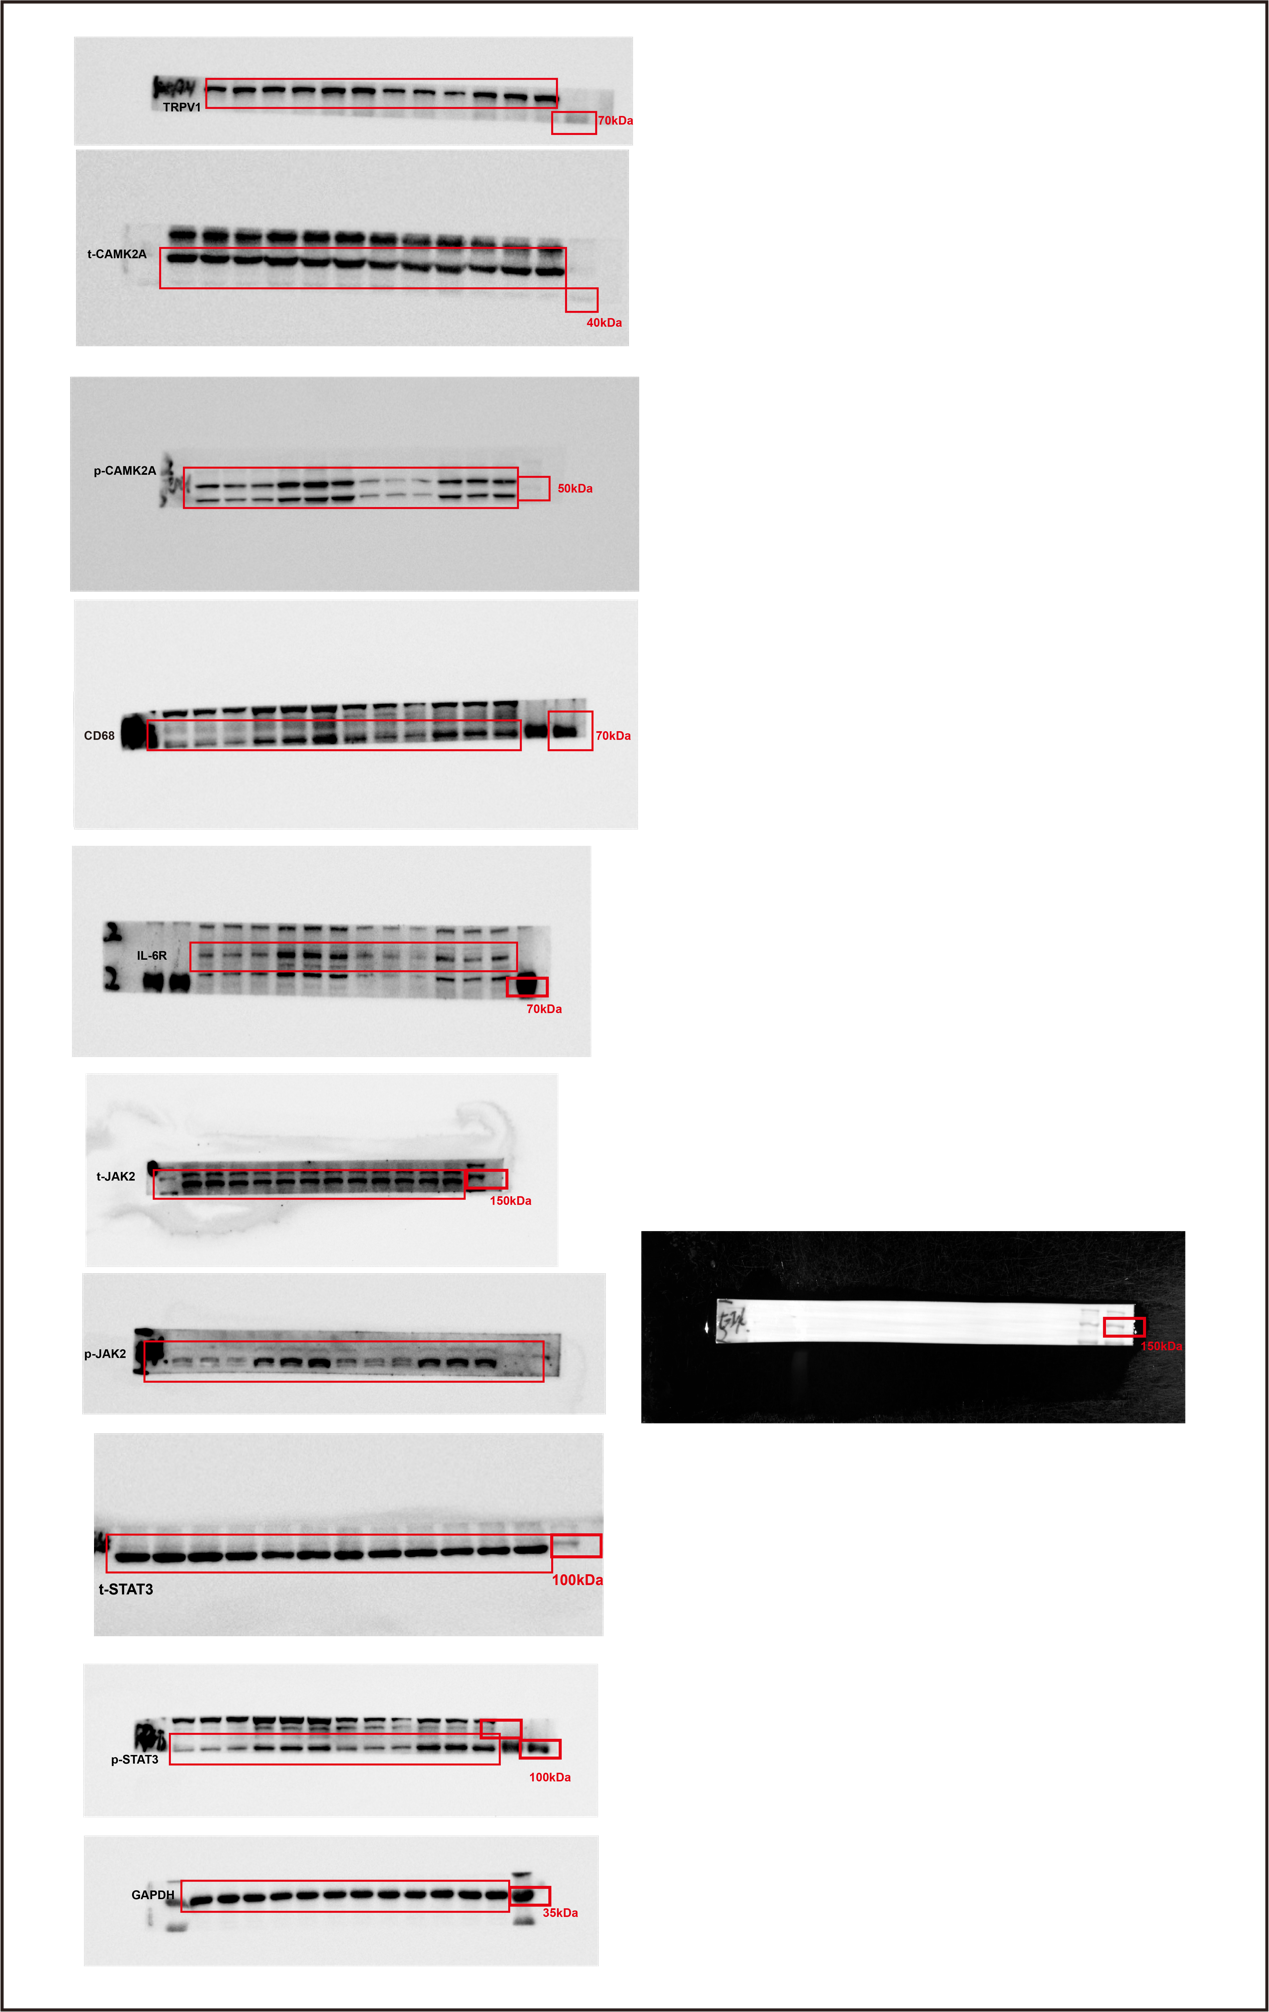

Supplement: Supplementary file 1 [file 027bb0cdd50cc207613e6657.docx]
